# Supplementary material
Source: publisher figshare collection journal article supplement (https://frontiersin.figshare.com/ndownloader/files/25276898)
Supplement: Supplementary file [file 25276898]

A: pUC57-GCaMP6S Plasmid

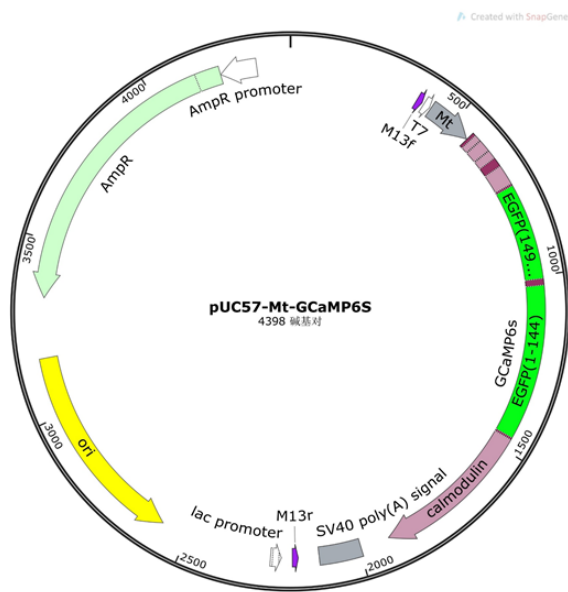

B: pGEMHE-MICU-mCherry Plasmid

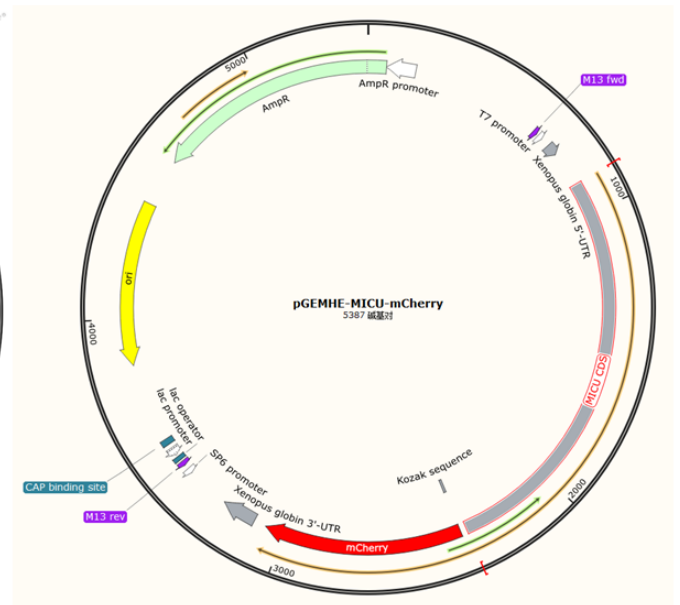

C: pUC57-GCaMP6S Template For cRNA

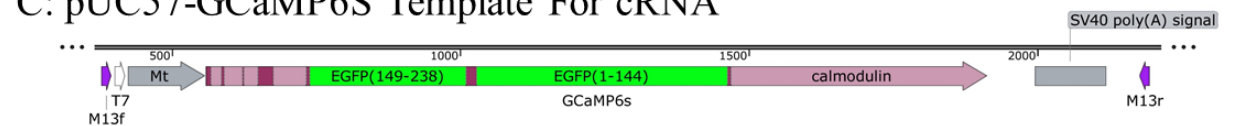

D: pGEMHE-MICU-mCherry Template For cRNA

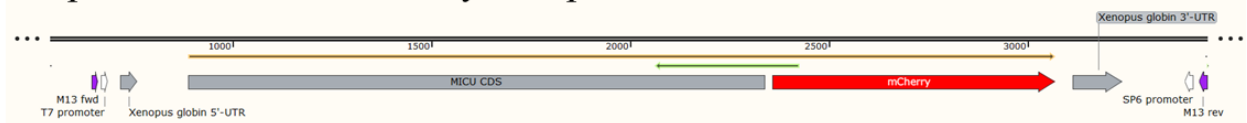

E: pGEMHE-VDAC-mCherry Template For cRNA

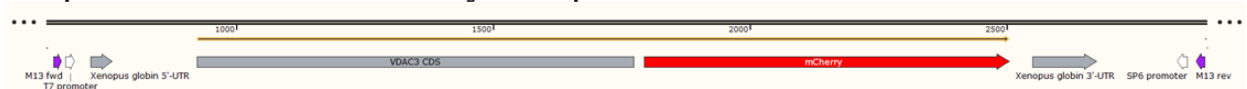

F: pGEMHE-CaM2-mCherry Template For cRNA

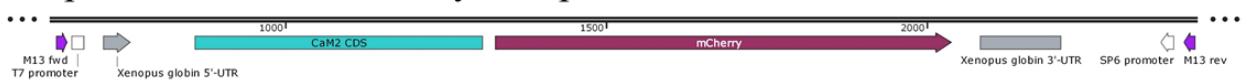

Supplementary Figure 1. Constructed vectors for in vitro expression. A and B: Complete cyclic plasmids maps of Mt-GCaMP6s and mCherry labeled protein. C to F: Templates for cRNA in vitro expression by PCR with primers M13F and M13R.



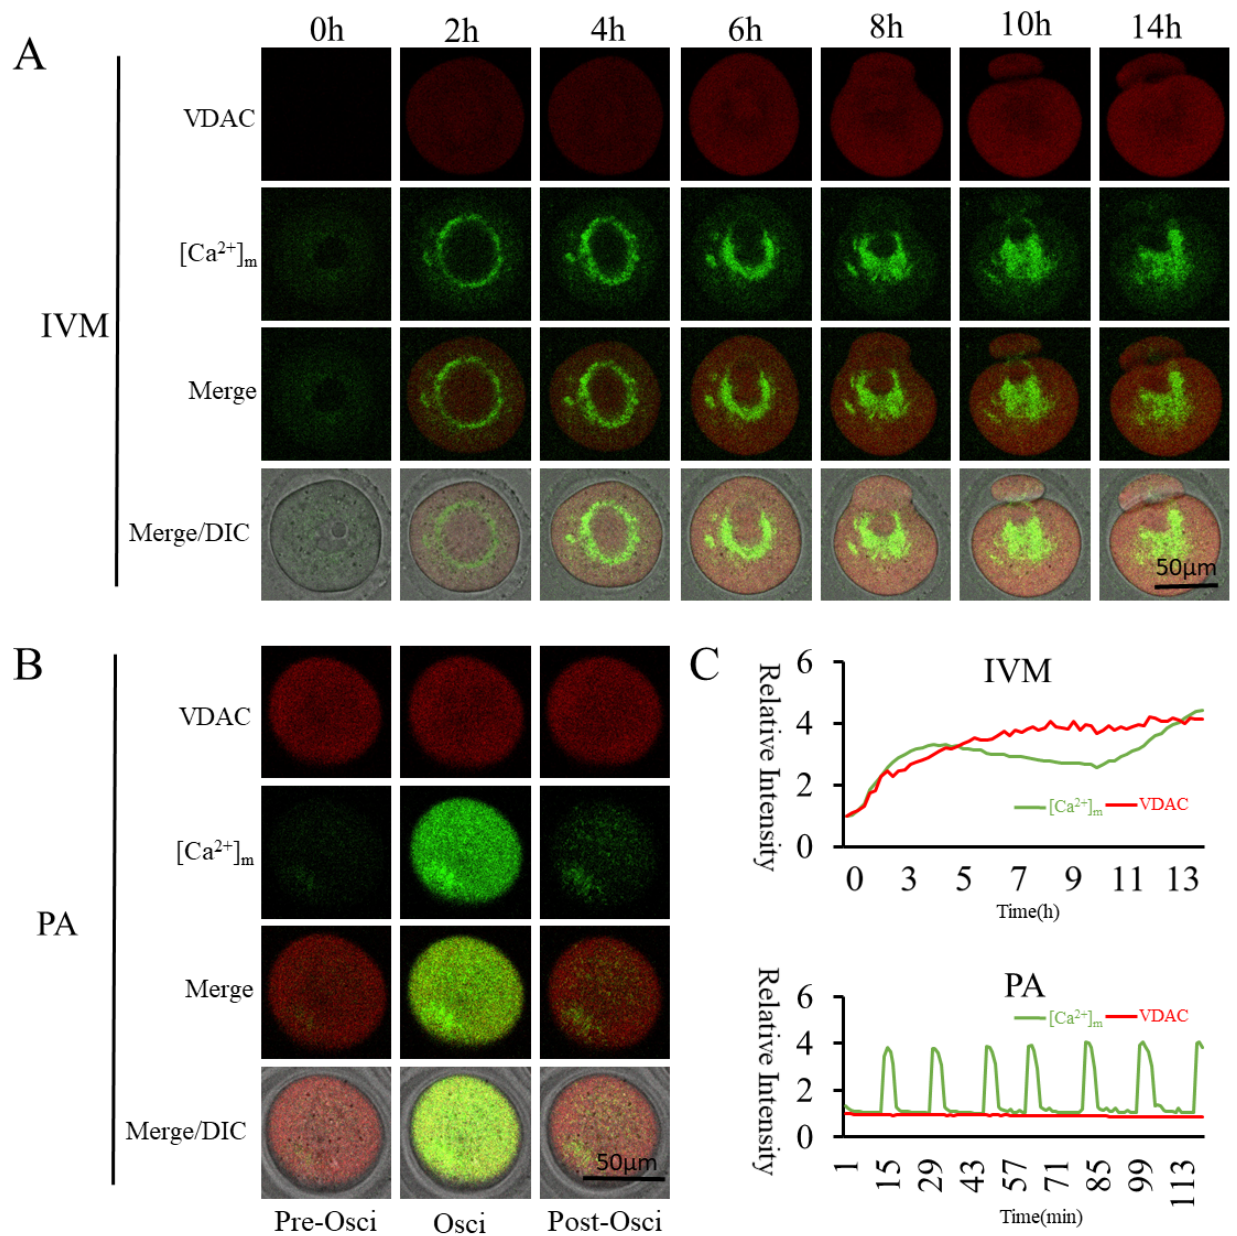

Supplementary Figure 3. Dynamic distribution of VDAC and higher  $[Ca^{2+}]_m$  mitochondria during oocyte maturation and activation. A and B: VDAC and higher  $[Ca^{2+}]_m$  mitochondria distribution during oocyte maturation and activation. C: Fluorescence intensity of VDAC (Red) and  $[Ca^{2+}]_m$  (Green) changes during maturation and activation. Ordinate is marked as Relative Fluorescence Intensity (relative to the fluorescence intensity of the start point).



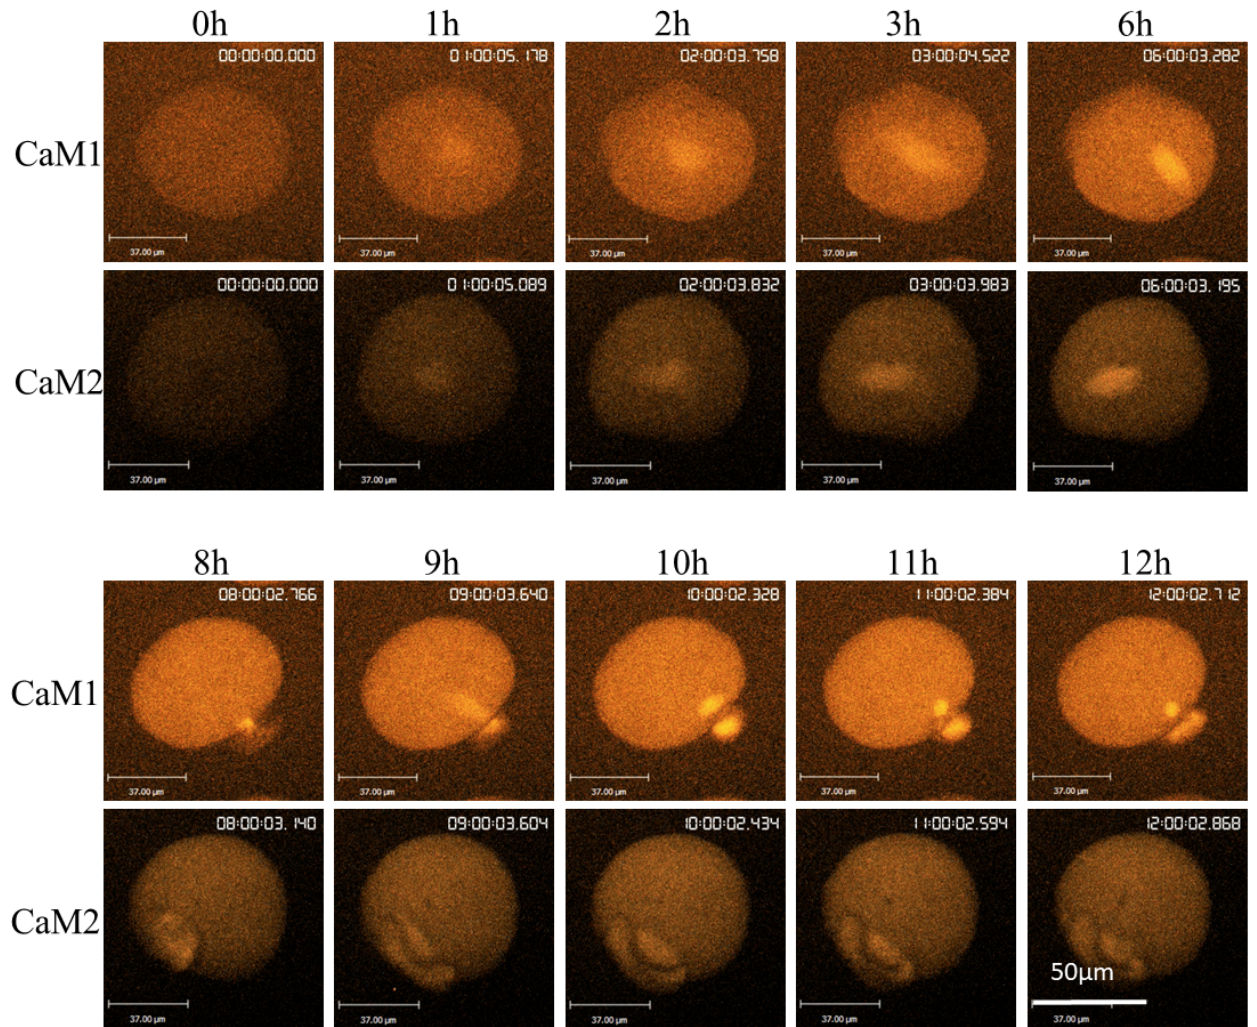

Supplementary Figure 4. CaM1 and CaM2 distribution in mature oocytes. Both CaM1 and CaM2 are located at the spindle.
